# Supplementary material for: Comprehensive Studies of Adsorption Equilibrium and Kinetics for Selected Aromatic Organic Compounds on Activated Carbon
Source: MDPI journal article supplement (doi:10.3390/molecules29092038), 2024-04-28
Supplement: s1 [file s1]

## Supplementary material for the paper:

### Comprehensive studies of adsorption equilibrium and kinetics for selected aromatic organic compounds on activated carbon

Małgorzata Wasilewska\*, Anna Derylo-Marczewska\* and Adam W. Marczewski

*Department of Physical Chemistry, Institute of Chemical Sciences, Faculty of Chemistry, Maria Curie-Skłodowska University in Lublin, Maria Curie-Skłodowska Sq. 3, 20-031 Lublin, Poland*

**\*Corresponding authors:** e-mail: [malgorzata.wasilewska@mail.umcs.pl](mailto:malgorzata.wasilewska@mail.umcs.pl), [anna.derylo-marczewska@mail.umcs.pl](mailto:anna.derylo-marczewska@mail.umcs.pl)

#### 2.2.3. Effect of adsorbent mass

**Table S1.** Relative standard deviations SD(c)/c<sub>0</sub> (%) for m-exp, FOE, SOE, MOE, f-FOE, f-SOE, f-MOE equations for F, 2-, 3- and 4-NF adsorption kinetics on RIAA activated carbon (constant initial concentration and variable adsorbent mass).

| System                           | m-exp<br>[%] | FOE<br>[%] | SOE<br>[%] | MOE<br>[%] | f-FOE<br>[%] | f-SOE<br>[%] | f-MOE<br>[%] |
|----------------------------------|--------------|------------|------------|------------|--------------|--------------|--------------|
| F/RIAA<br>Co=1.4mM, m=0.05g      | 0.163        | 1.650      | 1.519      | 1.238      | 1.396        | 0.802        | 0.806        |
| F/RIAA<br>Co=1.4mM, m=0.1g       | 0.190        | 2.729      | 0.929      | 0.694      | 1.453        | 0.194        | 0.195        |
| F/RIAA<br>Co=1.4mM, m=0.15g      | 0.832        | 0.885      | 2.825      | 0.843      | 0.871        | 0.849        | 0.797        |
| F/RIAA<br>Co=1.4mM, m=0.2g       | 0.094        | 1.302      | 2.618      | 0.479      | 0.705        | 0.715        | 0.720        |
| 2-NF/RIAA<br>Co=0.323mM, m=0.05g | 0.512        | 3.274      | 2.861      | 1.417      | 1.110        | 2.303        | 1.049        |
| 2-NF/RIAA<br>Co=0.323mM, m=0.1g  | 0.344        | 0.828      | 5.505      | 0.357      | 0.381        | 2.048        | 2.059        |
| 2-NF/RIAA<br>Co=0.323mM, m=0.15g | 0.251        | 0.398      | 6.222      | 0.271      | 0.315        | 2.130        | 16.989       |
| 2-NF/RIAA<br>Co=0.323mM, m=0.2g  | 0.455        | 0.682      | 5.721      | 0.464      | 0.473        | 2.204        | 4.384        |
| 3-NF/RIAA<br>Co=0.339mM, m=0.05g | 0.246        | 0.340      | 5.478      | 0.303      | 0.329        | 1.535        | 1.534        |
| 3-NF/RIAA<br>Co=0.339mM, m=0.1g  | 0.231        | 0.234      | 6.793      | 0.279      | 0.427        | 1.348        | 1.487        |
| 3-NF/RIAA<br>Co=0.339mM, m=0.15g | 0.480        | 0.482      | 7.066      | 0.503      | 0.493        | 2.197        | 2.209        |
| 3-NF/RIAA<br>Co=0.339mM, m=0.2g  | 0.451        | 0.691      | 5.702      | 0.442      | 0.449        | 2.189        | 4.369        |
| 4-NF/RIAA<br>Co=0.205mM, m=0.05g | 0.086        | 0.430      | 4.438      | 0.127      | 0.525        | 1.629        | 1.732        |

|                                  |       |       |       |       |       |       |       |
|----------------------------------|-------|-------|-------|-------|-------|-------|-------|
| 4-NF/RIAA<br>Co=0.205mM, m=0.1g  | 0.175 | 0.432 | 5.785 | 0.176 | 0.427 | 1.495 | 1.571 |
| 4-NF/RIAA<br>Co=0.205mM, m=0.15g | 0.327 | 0.528 | 6.045 | 0.364 | 0.493 | 2.156 | 2.189 |
| 4-NF/RIAA<br>Co=0.205mM, m=0.2g  | 0.106 | 0.589 | 4.528 | 0.114 | 0.461 | 2.175 | 4.256 |

#### 2.2.4. Effect of adsorbate concentrations

**Table S2.** Relative standard deviations SD(c)/c<sub>0</sub> (%) for m-exp, FOE, SOE, MOE, f-FOE, f-SOE, f-MOE equations for F, 2-, 3- and 4-NF adsorption kinetics on RIAA activated carbon (constant adsorbent mass and variable initial concentration).

| System                          | m-exp<br>[%] | FOE<br>[%] | SOE<br>[%] | MOE<br>[%] | f-FOE<br>[%] | f-SOE<br>[%] | f-MOE<br>[%] |
|---------------------------------|--------------|------------|------------|------------|--------------|--------------|--------------|
| F/RIAA<br>Co=1.4mM, m=0.1g      | 0.190        | 2.729      | 0.929      | 0.694      | 1.453        | 0.194        | 0.195        |
| F/RIAA<br>Co=0.933mM, m=0.1g    | 0.306        | 1.942      | 2.163      | 1.015      | 0.887        | 1.519        | 1.527        |
| F/RIAA<br>Co=0.7mM, m=0.1g      | 0.144        | 1.394      | 2.210      | 0.562      | 2.930        | 0.543        | 0.546        |
| F/RIAA<br>Co=467mM, m=0.1g      | 0.239        | 0.898      | 3.450      | 0.561      | 0.674        | 0.911        | 0.916        |
| 2-NF/RIAA<br>Co=0.323mM, m=0.1g | 0.344        | 0.828      | 5.505      | 0.357      | 0.381        | 2.048        | 2.059        |
| 2-NF/RIAA<br>Co=0.205mM, m=0.1g | 0.791        | 0.792      | 7.521      | 0.818      | 0.817        | 2.354        | 0.797        |
| 2-NF/RIAA<br>Co=0.161mM, m=0.1g | 0.211        | 0.213      | 6.887      | 0.218      | 0.217        | 2.310        | 2.328        |
| 2-NF/RIAA<br>Co=0.108mM, m=0.1g | 0.556        | 0.558      | 6.710      | 0.621      | 0.653        | 1.194        | 0.639        |
| 3-NF/RIAA<br>Co=0.339mM, m=0.1g | 0.252        | 1.068      | 4.697      | 0.276      | 0.449        | 1.894        | 16.708       |
| 3-NF/RIAA<br>Co=0.205mM, m=0.1g | 0.792        | 0.793      | 7.511      | 0.805      | 0.806        | 2.334        | 0.897        |
| 3-NF/RIAA<br>Co=0.169mM, m=0.1g | 0.211        | 0.212      | 6.887      | 0.314      | 0.227        | 2.310        | 2.328        |
| 3-NF/RIAA<br>Co=0.113mM, m=0.1g | 0.556        | 0.558      | 6.710      | 0.139      | 0.634        | 2.277        | 2.294        |
| 4-NF/RIAA<br>Co=0.205mM, m=0.1g | 0.123        | 0.268      | 2.681      | 0.296      | 0.379        | 1.685        | 6.542        |
| 4-NF/RIAA<br>Co=0.137mM, m=0.1g | 0.382        | 0.384      | 5.491      | 0.385      | 0.911        | 1.985        | 0.769        |
| 4-NF/RIAA<br>Co=0.102mM, m=0.1g | 0.175        | 0.178      | 5.752      | 0.176      | 0.427        | 1.910        | 2.208        |
| 4-NF/RIAA<br>Co=0.068mM, m=0.1g | 0.109        | 0.358      | 5.680      | 0.150      | 0.746        | 2.189        | 2.104        |

### 2.2.5. Effect of pH

**Table S3.** Relative standard deviations SD(c)/c<sub>0</sub> (%) for m-exp, FOE, SOE, MOE, f-FOE, f-SOE, f-MOE equations for 4-NF adsorption on GAC activated carbon at varying pH: 2, 7 and 10.

| System         | m-exp<br>[%] | FOE<br>[%] | SOE<br>[%] | MOE<br>[%] | f-FOE<br>[%] | f-SOE<br>[%] | f-MOE<br>[%] |
|----------------|--------------|------------|------------|------------|--------------|--------------|--------------|
| 4-NF/GAC pH=2  | 0.095        | 0.133      | 6.445      | 0.097      | 0.349        | 12.709       | 0.099        |
| 4-NF/GAC pH=7  | 0.615        | 0.998      | 5.248      | 0.694      | 0.650        | 2.163        | 18.606       |
| 4-NF/GAC pH=10 | 0.434        | 0.687      | 5.848      | 0.543      | 0.512        | 2.166        | 21.564       |

### 2.2.6. Effect of the presence of an accompanying substance

**Table S4.** Relative standard deviations SD(c)/c<sub>0</sub> (%) for m-exp, FOE, SOE, MOE, f-FOE, f-SOE, f-MOE equations for MB, 2-, 3- and 4-nitrophenol adsorption from dilute aqueous solutions on GAC activated carbon in single- and multi-component systems: 2-NF+MB, 3-NF+MB and 4-NF+MB.

| System            | m-exp<br>[%] | FOE<br>[%] | SOE<br>[%] | MOE<br>[%] | f-FOE<br>[%] | f-SOE<br>[%] | f-MOE<br>[%] |
|-------------------|--------------|------------|------------|------------|--------------|--------------|--------------|
| 2-NF/GAC          | 0.066        | 1.021      | 4.568      | 0.228      | 0.397        | 1.533        | 0.204        |
| 2-NF(2-NF+MB)/GAC | 0.769        | 1.455      | 3.399      | 0.835      | 0.987        | 1.377        | 5.386        |
| 3-NF/GAC          | 0.116        | 0.394      | 5.936      | 0.129      | 0.152        | 2.043        | 0.130        |
| 3-NF(3-NF+MB)/GAC | 0.883        | 1.208      | 4.829      | 0.947      | 0.963        | 1.887        | 5.638        |
| 4-NF/GAC          | 0.095        | 0.133      | 6.445      | 0.097      | 0.097        | 0.349        | 12.709       |
| 4-NF(4-NF+MB)/GAC | 0.528        | 0.532      | 0.668      | 5.591      | 0.530        | 2.037        | 17.879       |
| MB/GAC            | 0.513        | 7.180      | 15.981     | 0.673      | 0.862        | 1.225        | 1.228        |
| MB(MB+2-NF)/GAC   | 0.604        | 0.610      | 5.870      | 0.612      | 0.607        | 5.458        | 5.909        |
| MB(MB+3-NF)/GAC   | 0.506        | 0.695      | 6.429      | 0.508      | 0.495        | 2.449        | 6.182        |
| MB(MB+4-NF)/GAC   | 0.227        | 0.826      | 5.659      | 0.382      | 0.331        | 2.046        | 2.053        |
